# Supplementary material
Source: PubMed Central journal article supplement (PMC2669333)
Supplement: 0900427106_0900427106SI.pdf [file 0900427106_0900427106SI.pdf]

# Supporting Information

Fre et al. 10.1073/pnas.0900427106

## SI Materials and Methods

For staining intestinal paraffin sections, the following primary antibodies were used: rat anti-Hes1 (1:100; MBL) or rabbit anti-Hes1 (1:500; a generous gift from T. Sudo, Toray Industries, Tokyo), rabbit anti-Ki67 (1:200; Abcys) and rabbit anti-phosphorylated histone H3 (1:500; Upstate Biotechnology). Antigen retrieval was achieved by boiling in 10 mM citrate buffer (20 min) for all antibodies. Horseradish peroxidase-conjugated secondary antibodies were detected by using the DAB peroxidase substrate kit (Vector Laboratories). Identification of goblet cells on paraffin sections was performed by using periodic

acid/Schiff and alcian blue stain reagents as recommended by the manufacturer (VWR). Where indicated, nuclei were counterstained with hematoxylin QS (Vector Laboratories). Immunofluorescence was performed on frozen sections by using a polyclonal anti-GFP antibody generated in our laboratory. Cy3- or Alexa Fluor 488-coupled secondary antibodies (Molecular Probes) were detected by epifluorescent microscopy. Identification of goblet cells on frozen sections was performed by using Ulex Europeus agglutinin (UEA) coupled to FITC (1/50) (Sigma). For fluorescence staining, nuclei were stained with DAPI.

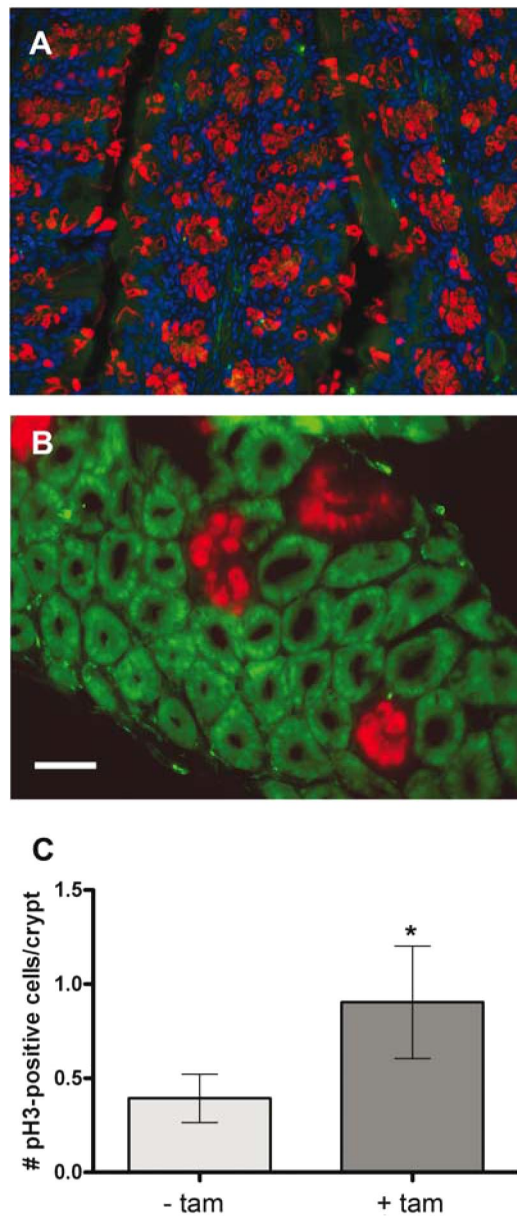

**Fig. S1.** Conditional Notch activation in adult mice arrests goblet cell differentiation and increases crypt cell proliferation. (*A* and *B*) Frozen tangential sections of adult colon from vilCreERT2/Nic mice either mock-injected (*A*) or induced with tamoxifen (*B*). Immunostaining was performed with a marker of goblet cells (UEA in red) and an antibody anti-GFP to reveal Nic expression (in green in *B*). Nuclei are marked with DAPI in blue in *A*. Nic expression, detected by the nuclear GFP signal in green, is absent in noninduced mice (*A*) and is mosaic in tamoxifen-treated vilCreERT2/Nic mice (green nuclear staining in *B*). The colon presents a very high number of goblet cells (red cells in *A*), and Notch activation completely blocks the differentiation of this cell type (*B*). (Scale bar, 80  $\mu\text{m}$ .) (*C*) Quantification of the number of mitotic cells was performed by counting phosphorylated histone H3-positive nuclei per crypt in vilCreERT2/Nic mice  $\pm$  tamoxifen and shows a statistically significant increase in the number of mitotic cells in the crypts of mice induced to express Nic. Ten untreated vilCreERT2/Nic mice and 10 tamoxifen-induced vilCreERT2/Nic mice were processed for immunohistochemistry, and 150 crypts per animal were counted.

**Table S1. List of oligonucleotide sequences used for qPCR**

| Primer name | Target                   | Species specificity | Primer sequence 5' to 3'  | Product size, bp | Direction |
|-------------|--------------------------|---------------------|---------------------------|------------------|-----------|
| Hes1SF s    | Hes1                     | Mouse               | ACACCGGACAAACCAAAGAC      | 148              | Forward   |
| Hes1SF as   |                          | Mouse               | AATGCCGGGAGCTATCTTTC      |                  | Reverse   |
| mBeta2 s    | $\beta_2$ -Microglobulin | Mouse               | GCTATCCAGAAAACCCCTCAA     | 102              | Forward   |
| mBeta2 as   |                          | Mouse               | AGGCGGGTGGAACTGTGTT       |                  | Reverse   |
| TFII s      | TATA box-binding protein | Mouse               | CCACGGACAACCTGCGT         | 236              | Forward   |
| TFII as     |                          | Mouse               | GGCTCATAGCTACTGA          |                  | Reverse   |
| hHes1F      | Hes1                     | Human               | AGGCGGACATTCTGGAAATG      | 103              | Forward   |
| hHes1R      |                          | Human               | CGGTACTTCCCCAGCACACTT     |                  | Reverse   |
| hHeyLF      | HeyL                     | Human               | TCCCCACTGCCTTTGAG         | 583              | Forward   |
| hHeyLR      |                          | Human               | CTGCTGGGGGCGACA           |                  | Reverse   |
| hJ1F        | Jagged1                  | Human               | CAACCGTGCCAGTGACTATTTCTGC | 250              | Forward   |
| hJ1R        |                          | Human               | TGTTCCCGTGAAGCCTTTGTTACAG |                  | Reverse   |
| hJ2F        | Jagged2                  | Human               | TGGGATGCCTGGCACA          | 550              | Forward   |
| hJ2R        |                          | Human               | CCGGCAGATGCAGGA           |                  | Reverse   |
| hN1F        | Notch1                   | Human               | CACTGTGGGCGGGTCC          | 85               | Forward   |
| hN1R        |                          | Human               | GTTGTATTGGTTCGGCACCAT     |                  | Reverse   |
| hN2F        | Notch2                   | Human               | AATCCCTGACTCCAGAACG       | 589              | Forward   |
| hN2R        |                          | Human               | TGGTAGACCAAGTCTGTGATGAT   |                  | Reverse   |
| hbactF      | $\beta$ -Actin           | Human               | CGCAAGTACTCCGTGTGGA       | 337              | Forward   |
| hbactR      |                          | Human               | CGGCCACATTGTGAACTTTG      |                  | Reverse   |
| hGAPDHf     | GAPDH                    | Human               | GTCATCCCTGAGCTGAACG       | 347              | Forward   |
| hGAPDHR     |                          | Human               | CTCCTTGGAGGCCATGTG        |                  | Reverse   |
| hHPRTf      | HPRT*                    | Human               | GCTTTCCTTGGTCAGGCAGTATAAT | 142              | Forward   |
| hHPRTR      |                          | Human               | AAGGGCATATCCTACAACAACTTG  |                  | Reverse   |

\*Hypoxanthine-guanine phosphoribosyltransferase.
